# Supplementary material for: Design, synthesis, structure, and photophysical features of highly emissive cinnamic derivatives
Source: Royal Society of Chemistry journal article supplement (doi:10.1039/d0nj02429e), 2020-01-01
Supplement: d0nj02429e1.pdf [file d0nj02429e1.pdf]

Electronic Supplementary Information for

# Identification and Isolation of Highly Emissive Cinnamic Derivatives in $\pi$ -Stacked Polybenzofulvene Derivatives for Optoelectronic Applications

*Marco Paolino,<sup>a</sup> Annalisa Reale,<sup>a</sup> Vincenzo Razzano,<sup>a</sup> Gianluca Giorgi,<sup>a</sup> Germano Giuliani,<sup>a</sup>  
Francesca Villafiorita-Monteleone<sup>b</sup> Chiara Botta,<sup>b</sup> Carmen Coppola,<sup>c,d</sup> Adalgisa Sinicropi,<sup>c,d,e</sup>  
Andrea Cappelli.<sup>\*,a</sup>*

<sup>a</sup>Dipartimento di Biotecnologie, Chimica e Farmacia (Dipartimento di Eccellenza 2018-2022),  
Università degli Studi di Siena, Via Aldo Moro 2, 53100 Siena, Italy

<sup>b</sup>Istituto di Scienze e Tecnologie Chimiche “G. Natta” - SCITEC (CNR), Via A. Corti 12, 20133  
Milano, Italy

<sup>c</sup>R<sup>2</sup>ES Lab, Department of Biotechnology, Chemistry and Pharmacy, University of Siena, 53100  
Siena, Italy, [www.r2eslab.com](http://www.r2eslab.com)

<sup>d</sup>Center for Colloid and Surface Science (CSGI), 50019 Firenze, Italy

<sup>e</sup>National Research Council, Institute for the Chemistry of Organometallic Compounds (CNR-  
ICCOM), 50019 Firenze, Italy

**Table ESI1.** Optical properties of cinnamic derivatives **1a-c** compared with those of the corresponding polybenzofulvene derivatives poly-6-DMFL-**BF3k**, poly-6-MCBZ-**BF3k**, and poly-6-TPA-**BF3k**.

| compound or polymer                   | solution <sup>a</sup> |                      |        | powder               |                 |
|---------------------------------------|-----------------------|----------------------|--------|----------------------|-----------------|
|                                       | $\lambda_{ab}$ (nm)   | $\lambda_{emi}$ (nm) | QY (%) | $\lambda_{emi}$ (nm) | QY (%)          |
| <b>1a</b>                             | 334                   | 430                  | 57     | 407                  | 64 <sup>b</sup> |
| poly-6-DMFL- <b>BF3k</b> <sup>c</sup> | 295, 319,<br>345      | 465                  | 21     | 486 <sup>d</sup>     | 24 <sup>d</sup> |
| <b>1b</b>                             | 242, 302,<br>347      | 480                  | 77     | 448, 466             | 69 <sup>e</sup> |
| poly-6-MCBZ- <b>BF3k</b> <sup>c</sup> | 290, 350              | 497                  | 17     | 535                  | 19              |
| <b>1c</b>                             | 292, 371              | 540                  | 78     | 470                  | 80 <sup>f</sup> |
| poly-6-TPA- <b>BF3k</b> <sup>c</sup>  | 305, 377              | 495                  | 46     | 530                  | 35              |

<sup>a</sup> dichloromethane, <sup>b</sup>  $\lambda_{ex} = 350$  nm, <sup>c</sup> see ref [1], <sup>d</sup> cast films from dichloromethane solutions, <sup>e</sup>  $\lambda_{ex} = 380$  nm, <sup>f</sup>  $\lambda_{ex} = 420$  nm.

**Table ESI2.** TD-DFT (MPW1K/6-311+G(2d,p) computed absorption maxima ( $\lambda_{\text{a}}^{\text{max}}$ , nm), vertical excitation energies ( $E_{\text{exc}}$ , eV), oscillator strengths ( $f$ ) and composition in terms of molecular orbitals for the lowest singlet-singlet excitation of **1a**, **1b**, **1c'** and **1c''** in  $\text{CH}_2\text{Cl}_2$  and for **1c**, **1c'** and **1c''** in gas-phase.

| Molecules   |                          | Excited states | $\lambda_{\text{a}}^{\text{max}}$ | $E_{\text{exc}}$ | $f$  | Transition (%)                                                                   |
|-------------|--------------------------|----------------|-----------------------------------|------------------|------|----------------------------------------------------------------------------------|
| <b>1a</b>   | $\text{CH}_2\text{Cl}_2$ | 1              | 336                               | 3.68             | 1.70 | 89% H $\rightarrow$ L                                                            |
| <b>1b</b>   | $\text{CH}_2\text{Cl}_2$ | 1              | 336                               | 3.69             | 1.64 | 85% H-1 $\rightarrow$ L                                                          |
|             |                          | 2              | 325                               | 3.82             | 0.06 | 72% H $\rightarrow$ L                                                            |
|             |                          | 3              | 275                               | 4.51             | 0.08 | 31% H $\rightarrow$ L+1<br>24% H-2 $\rightarrow$ L                               |
|             |                          | 8              | 238                               | 5.21             | 0.31 | 35% H $\rightarrow$ L+3<br>14% H-3 $\rightarrow$ L                               |
|             |                          | 9              | 232                               | 5.35             | 0.34 | 31% H-3 $\rightarrow$ L<br>8% H-1 $\rightarrow$ L+2                              |
| <b>1c</b>   | Gas-phase                | 1              | 367                               | 3.38             | 0.09 | 62% H-2 $\rightarrow$ L+1                                                        |
|             |                          | 3              | 358                               | 3.46             | 0.21 | 56% H-3 $\rightarrow$ L                                                          |
|             |                          | 4              | 349                               | 3.56             | 2.67 | 29% H-1 $\rightarrow$ L+3<br>13% H-2 $\rightarrow$ L+1<br>9% H-2 $\rightarrow$ L |
| <b>1c'</b>  | $\text{CH}_2\text{Cl}_2$ | 1              | 364                               | 3.40             | 1.30 | 85% H $\rightarrow$ L                                                            |
|             |                          | 3              | 286                               | 4.34             | 0.31 | 82% H $\rightarrow$ L+3                                                          |
|             |                          | 4              | 285                               | 4.34             | 0.21 | 64% H-1 $\rightarrow$ L<br>9% H $\rightarrow$ L+3                                |
| <b>1c'</b>  | Gas-phase                | 1              | 351                               | 3.52             | 1.17 | 82% H $\rightarrow$ L                                                            |
|             |                          | 3              | 283                               | 4.37             | 0.22 | 88% H $\rightarrow$ L+3                                                          |
|             |                          | 4              | 278                               | 4.46             | 0.22 | 64% H-1 $\rightarrow$ L                                                          |
| <b>1c''</b> | $\text{CH}_2\text{Cl}_2$ | 2              | 366                               | 3.38             | 2.54 | 51% H-1 $\rightarrow$ L                                                          |
|             |                          | 8              | 287                               | 4.33             | 0.19 | 45% H $\rightarrow$ L+6                                                          |
|             |                          | 9              | 287                               | 4.33             | 0.37 | 45% H $\rightarrow$ L+7                                                          |
|             |                          | 10             | 284                               | 4.36             | 0.51 | 44% H-3 $\rightarrow$ L<br>9% H-1 $\rightarrow$ L+7                              |
| <b>1c''</b> | Gas-phase                | 2              | 356                               | 3.48             | 2.24 | 53% H-1 $\rightarrow$ L<br>24% H-2 $\rightarrow$ L+1                             |
|             |                          | 7              | 286                               | 4.34             | 0.28 | 31% H-1 $\rightarrow$ L+6<br>26% H $\rightarrow$ L+7                             |
|             |                          | 8              | 285                               | 4.34             | 0.14 | 40% H $\rightarrow$ L+6<br>34% H-1 $\rightarrow$ L+7                             |
|             |                          | 10             | 277                               | 4.47             | 0.42 | 40% H-3 $\rightarrow$ L<br>23% H-2 $\rightarrow$ L+1                             |

## References

- [1] A. Cappelli, V. Razzano, G. Fabio, M. Paolino, G. Grisci, G. Giuliani, A. Donati, R. Mendichi, W. Mróz, F. Villafiorita-Monteleone, C. Botta, Side chain engineering in  $\pi$ -stacked polybenzofulvene derivatives bearing electron-rich chromophores for OLED applications, *RSC Adv.* 5 (2015) 101377–101385. doi:10.1039/c5ra21164f.
